# Supplementary material for: One-pot hydrothermal synthesis of fluorophore-modified cerium oxide nanoparticles
Source: Royal Society of Chemistry journal article supplement (doi:10.1039/d4cp00237g), 2024-01-01
Supplement: d4cp00237g1.pdf [file d4cp00237g1.pdf]

## Supporting Information

# One-pot hydrothermal synthesis of fluorophore-modified cerium oxide nanoparticles

*Daria V. Tsyupka*<sup>1\*</sup>, *Sergey V. Pigarev*<sup>1</sup>, *Yuliya A. Podkolodnaya*<sup>1</sup>, *Ekaterina A. Khudina*<sup>1</sup>,  
*Nelli R. Popova*<sup>2</sup>, *Irina Yu. Goryacheva*<sup>1</sup>, *Olga A. Goryacheva*<sup>1</sup>

<sup>1</sup>Saratov State University, 83 Astrakhanskaya Street, Saratov 410012, Russia

<sup>2</sup>Institute of Theoretical and Experimental Biophysics, Russian Academy of Sciences,  
Institutskaya str., 3, Moscow Region, Pushchino 142290, Russia

\* - corresponding author

E-mail address: [tsyupkadv@mail.ru](mailto:tsyupkadv@mail.ru)

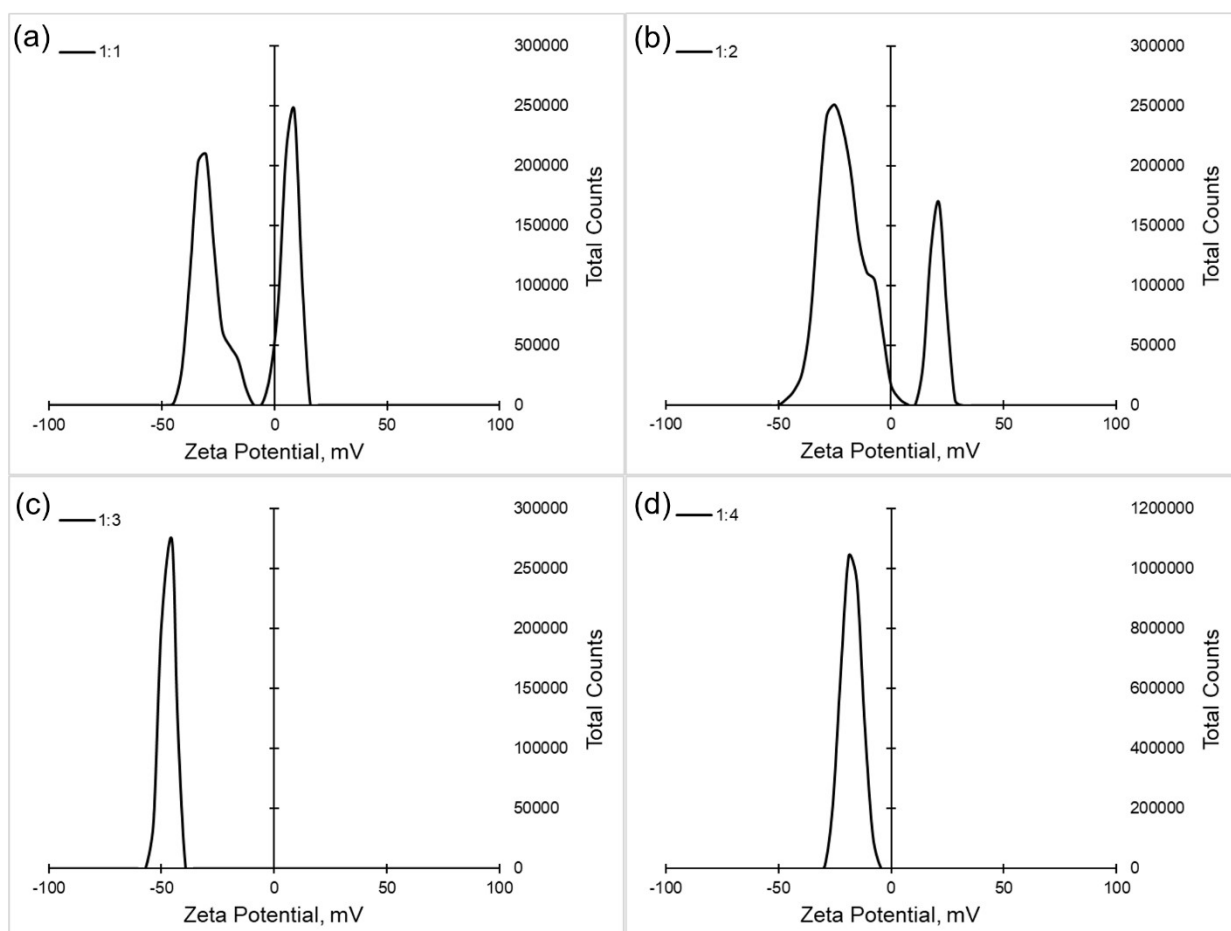

Figure S1.  $\zeta$ -potentials of CeO<sub>2</sub>-IPCA NPs obtained with different Ce<sup>3+</sup> and CA ratio

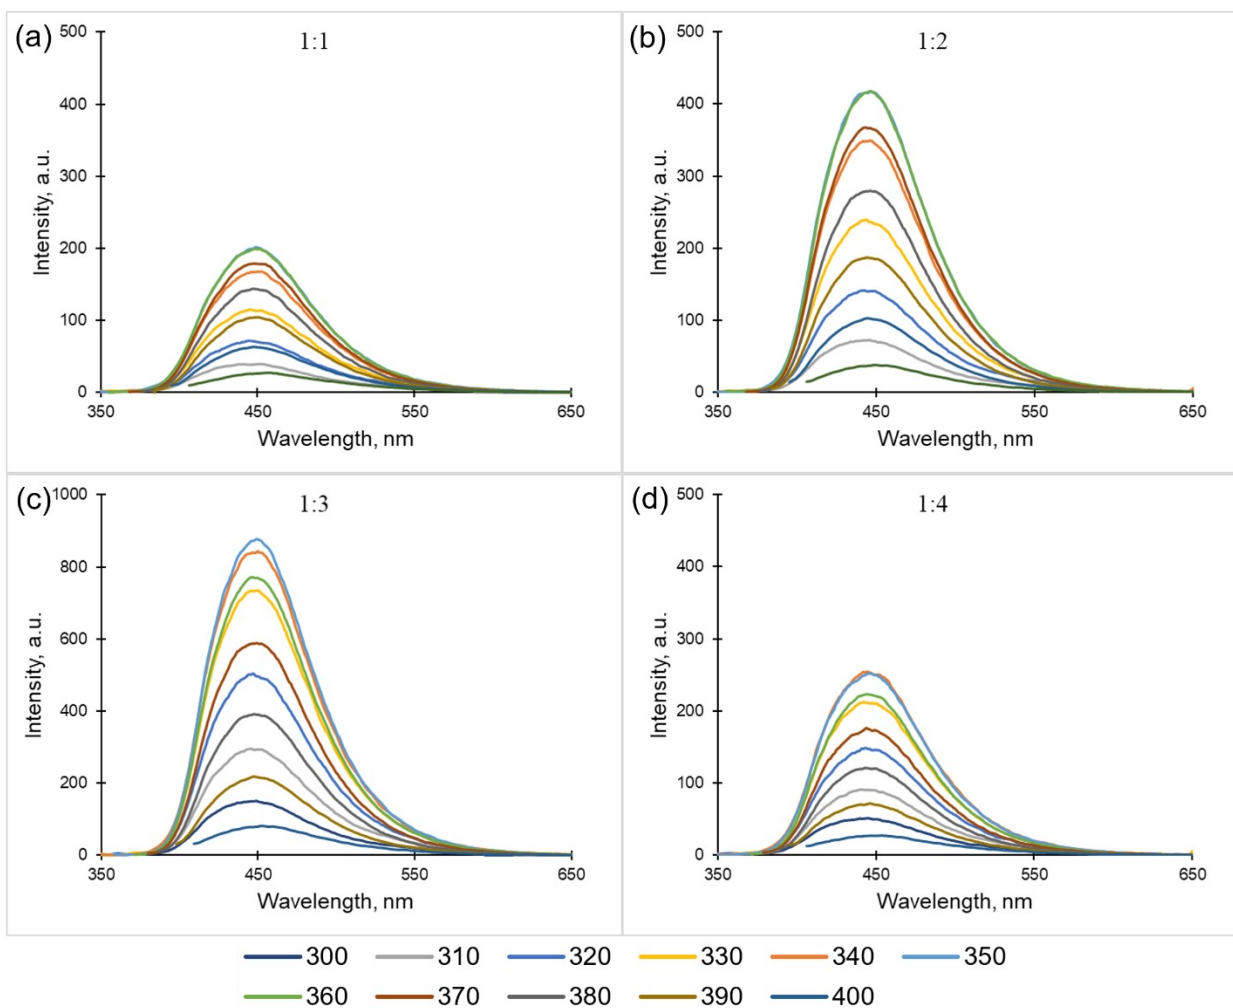

Figure S2. Fluorescence spectra ( $\lambda_{\text{ex}} = 300\text{-}400\text{ nm}$ ) of CeO<sub>2</sub>-IPCA NPs obtained with different Ce<sup>3+</sup> and CA ratio

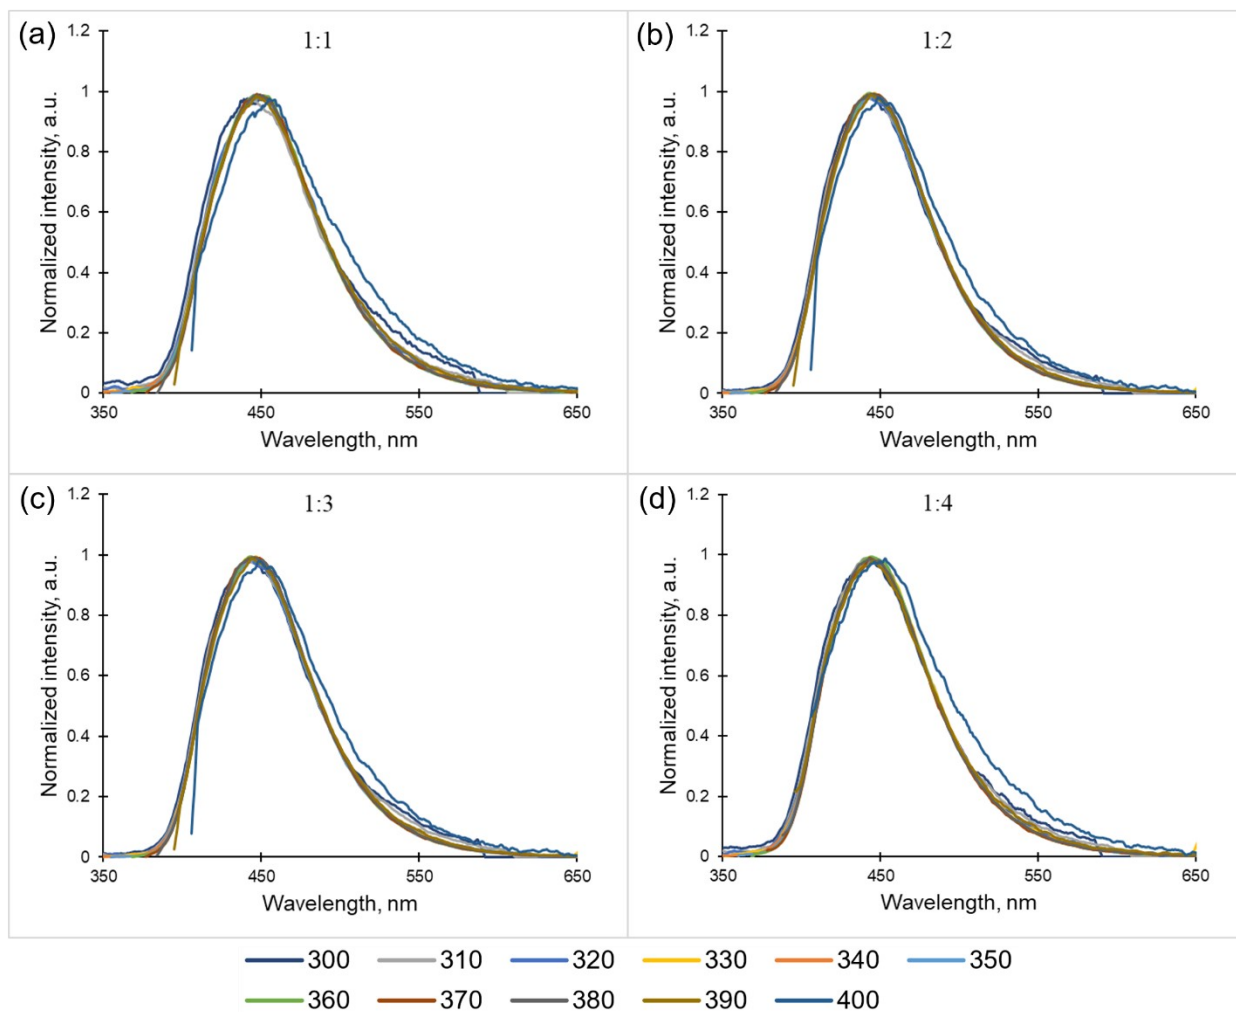

Figure S3. Normalized fluorescence spectra ( $\lambda_{\text{ex}} = 300\text{-}400$  nm) of  $\text{CeO}_2$ -IPCA NPs obtained with different  $\text{Ce}^{3+}$  and CA ratio

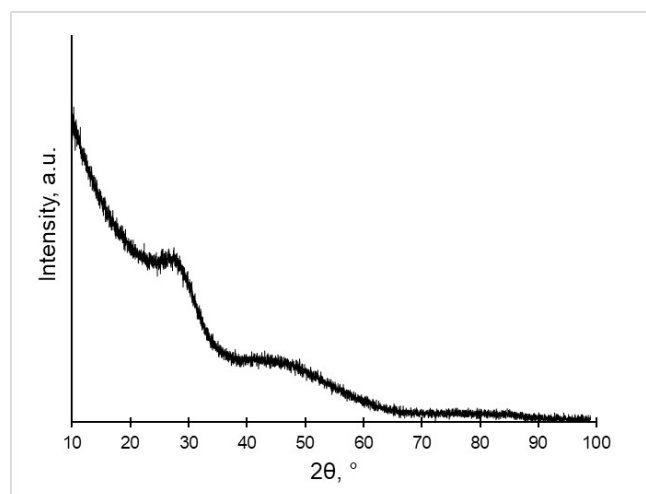

Figure S4. XRD patterns of  $\text{CeO}_2$ -IPCA NPs
